# Supplementary material
Source: publisher site journal article supplement (https://www.dovepress.com/get_supplementary_file.php?f=400107.xlsx)
Supplement: Supplementary file 1 [file get_supplementary_file.php]

## Sheet: Table S1 The merged ferroptosis
Table S1 The merged ferroptosis-related gene set
STAT3
ENPP2
SLC38A1
TXNRD1
POR
CDKN1A
ATF4
CEBPG
BRD4
ASNS
FZD7
ATF3
LPCAT3
PRDX6
AQP3
PRDX1
NT5DC2
MTCH1
DAZAP1
PLIN2
AKR1C1
CBS
LPIN1
ARNTL
SLC39A14
HAMP
HSPB1
AHCY
ISCU
KDM3B
SCD
XBP1
AKR1C3
PGD
ZEB1
INTS2
LYRM1
CYBB
CD82
MT3
WIPI1
ARRDC3
JUN
AGPAT3
GLRX5
MAP1LC3A
MDM4
PIR
STEAP3
PHF21A
IDH2
PRKAA2
DNAJB6
HMOX1
GABARAPL2
FXN
IL33
RPL8
IREB2
ATP5MC3
CS
EMC2
ACSF2
NOX1
NOX3
NOX4
NOX5
DUOX1
DUOX2
G6PD
VDAC2
PIK3CA
FLT3
SCP2
TP53
ACSL4
NRAS
KRAS
HRAS
TF
TFRC
TFR2
SLC1A5
GLS2
GOT1
CARS1
ALOX5
KEAP1
ATG5
ATG7
NCOA4
ALOX12
ALOX12B
ALOX15
ALOX15B
ALOXE3
PHKG2
ACO1
G6PDX
ULK1
ATG3
ATG4D
BECN1
GABARAPL1
ATG16L1
WIPI2
SNX4
ATG13
ULK2
SAT1
EGFR
MAPK3
MAPK1
BID
DPP4
CDKN2A
PEBP1
SOCS1
CDO1
MYB
MAPK8
MAPK9
CHAC1
MAPK14
LINC00472
PRKAA1
ELAVL1
BAP1
ABCC1
MIR6852
ACVR1B
TGFBR1
EPAS1
HILPDA
HIF1A
IFNG
ANO6
HMGB1
TNFAIP3
TLR4
ATM
YY1AP1
EGLN2
MIOX
TAZ
MTDH
IDH1
SIRT1
FBXW7
PANX1
BACH1
LONP1
IL1B
CTSB
CYB5R1
ELOVL5
FADS1
FBW7
PTEN
NR1D1
NR1D2
TBK1
IL6
USP7
miR-182-5p
miR-378a-3p
AQP5
AQP8
LINC00618
MT1DP
PEX10
PEX12
CHP1
GPAT4
BRPF1
OSBPL9
MMD
CYP4F8
MLLT1
TTPA
GRIA3
EPT1
POM121L12
LIG3
AEBP2
AGPS
CDCA3
PEX2
PEX6
TIMM9
DCAF7
LCE2C
FAR1
SMAD7
AMN
PEX3
ACADSB
PVT1
hsa_circ_0008367
MAP3K11
GSK3B
BRD7
SLC25A28
MFN2
SLC11A2
ZFAS1
TSC1
TGFB1
SNCA
SIRT3
CGAS
STING1
HDDC3
MIR761
MDM2
MIR214
DLD
WWTR1
PRKCA
PTGS2
DUSP1
NOS2
NCF2
UBC
ALB
SRXN1
GPX2
BNIP3
OXSR1
SELENOS
ANGPTL7
SLC7A11
DDIT4
LOC284561
TSC22D3
DDIT3
JDP2
SESN2
SLC1A4
PCK2
TXNIP
VLDLR
GPT2
PSAT1
LURAP1L
SLC7A5
HERPUD1
SLC3A2
ZNF419
KLHL24
TRIB3
ZFP69B
ATP6V1G2
VEGFA
GDF15
TUBE1
SNORA16A
RGS4
BLOC1S5-TXNDC5
LOC390705
EIF2S1
KIM-1
CXCL2
RELA
HSD17B11
SETD1B
FTL
MAFG
FTH1
SLC40A1
GPX4
NFE2L2
DRD5
DRD4
MAP3K5
SLC2A1
SLC2A3
SLC2A6
SLC2A8
SLC2A12
GLUT13
SLC2A14
EIF2AK4
TFAP2C
SP1
HBA1
NNMT
PLIN4
HIC1
STMN1
RRM2
CAPG
HNF4A
NGB
YWHAE
GABPB1
AURKA
MIR4715
RIPK1
MIR30B
MMP13
LRRFIP1
AKR1C2
RB1
HSF1
GCLC
SQSTM1
NQO1
MUC1
MT1G
CISD1
FANCD2
FTMT
HSPA5
HELLS
FADS2
SRC
PML
MTOR
NFS1
TP63
MIR137
FH
CISD2
MIR9-1
MIR9-2
MIR9-3
ACSL3
OTUB1
CD44
LINC00336
MIR17
NF2
CA9
TMBIM4
MIR212
Fer1HCH
AIFM2
LAMP2
ZFP36
PROM2
CHMP5
CHMP6
CAV1
GCH1
HCAR1
SLC16A1
NR4A1
RPTOR
SREBF1
SREBF2
P4HB
BCAT2
PLA2G6
MIR424
PARK7
SUV39H1
ATF2
ACOT1
ALDH3A2
STK11
FNDC5
CircIL4R
CDH1
NEDD4L
BRD2
BRD3
BRDT
DECR1
NCOA3
NR5A2
PANX2
RHEBP1
TFAP2A
CP
ARF6
ABHD12
PPP1R13L
TFAM
RNF113A
circ-TTBK2
MIR522
PPARA
SIAH2
VDR
NEDD4
AR
MTF1

## Sheet: Table S2 Detailed primer inform
Table S2 Detailed primer information
Gene	Primer sequence
ACTB	F	GAGACCTTCAACACCCCAGC
	R	ATGTCACGCACGATTTCCC
PTGS2	F	TCTGGTGCCTGGTCTGATGATGT
	R	TTCTGATACTGGAACTGCTGGTTGAA
STAT3	F	CCGATGCCTGTGGGAAGAGTCT
	R	TCTGTCACTACGGCGGCTGTT
NOX4	F	TGGCTGGAGGCATTGGAGTCA
	R	ACCACTGGAATGATTGGATGTCTCTG
TP53	F	GCCATCTACAAGAAGTCACAGCACAT
	R	GGTAAGGATAGGTCGGCGGTTCA
HIF1A	F	CCACAACTGCCACCACTGATGAA
	R	TGCCACTGTATGCTGATGCCTTAG
NFE2L2	F	GCACGCTGAAGGCACAATGGA
	R	GGATTCACGCATAGGAGCACTGT
MAPK3	F	ATAGGCATCCGAGACATCCTCAGAG
	R	CGCAGGTGGTGTTGATAAGCAGAT
RELA	F	AGGCTTCTGGGCCTTATGTG
	R	TGCTTCTCTCGCCAGGAATAC
PTEN	F	GGAAAGGGACGGACTGGTGTAATG
	R	CGCCTCTGACTGGGAATTGTGAC
EGFR	F	AGCCACACCTATCATTCCAGAGACA
	R	TCCTCGCACCTCAGTTGAACCA
PPARA	F	CTTCACGATGCTGTCCTCCTTGATG
	R	GATGTCACAGAACGGCTTCCTCAG

## Sheet: Table S3 Identified DEGs in GSE
Table S3 Identified DEGs in GSE79962
Gene symbol	logFC	adj.P.Val
HBA2	6.08315	8.7e-12
HBB	5.36807	5.78e-09
DEFA1B	3.63094	0.004399
NPPB	3.58724	0.003732
NPPA	3.29151	0.000493
SNORA73A	3.19412	0.000316
TNFRSF11B	3.17713	0.000222
SCARNA10	2.64057	0.000196
RNU1-89P	2.54716	0.000917
THBS1	2.45495	0.000415
RRAD	2.36468	0.000275
SNORD3B-1	2.36414	0.000356
ADAMTS9	2.27994	8.95e-06
RARRES1	2.1698	0.000141
ANGPT2	2.13323	7.73e-05
S100A12	2.12897	0.001976
GADD45B	2.09802	5.26e-05
SERPINE1	2.06734	0.014974
MLLT11	2.05979	0.000333
CCL11	2.02016	0.005073
GRAMD1B	2.01596	0.001531
PLIN2	2.00502	0.000285
RNVU1-18	1.99822	0.001942
STC1	1.9898	9.31e-05
SLC6A6	1.98554	0.008909
S100A8	1.90254	0.001337
SNORA75	1.85184	0.003244
CCL2	1.84399	0.006036
IL1RL1	1.83329	0.006989
MID1	1.82496	0.000305
RNU4-1	1.81377	0.001283
SERPINE2	1.80917	0.002001
SNORD32A	1.80223	0.00095
RPPH1	1.77396	4.97e-06
PLA2G2A	1.75093	0.000212
SNORA23	1.70613	0.000517
CYP1B1	1.69548	0.000278
SNORA45A	1.68502	0.003748
C1QTNF1	1.68024	0.001144
JUNB	1.65559	4.97e-08
SCARNA7	1.65317	0.000732
PI15	1.63183	0.003268
SLN	1.62919	0.034142
HILPDA	1.62522	0.005395
RNU2-31P	1.61709	0.005032
PTX3	1.60824	0.026308
S100A9	1.59174	0.001928
CP	1.57364	0.000103
C10orf10	1.53898	0.00023
MID1IP1	1.53782	0.001285
SNORA33	1.51581	3.37e-06
RNF122	1.50329	0.000425
RNU4-2	1.50249	0.006081
SNORA80E	1.49684	0.00057
HBD	1.48676	0.000721
CHI3L1	1.47287	0.004758
SNORD33	1.46738	0.00217
HAMP	1.44032	0.007034
RNU2-2P	1.42576	0.005109
TMEM2	1.42333	7.73e-05
HSPA1B	1.41893	0.000792
SNORD38B	1.41513	0.000316
PNP	1.40898	0.001629
SERPINA3	1.40376	0.015314
CISH	1.40323	0.000376
SLC2A3	1.39352	0.000316
BHLHE40	1.39057	0.000193
ZFP36	1.38794	0.000482
SNORD6	1.37008	0.000755
ETS2	1.36657	2.13e-05
TIMP1	1.36024	0.002826
SOCS3	1.34907	0.000103
SNORD5	1.33627	3.25e-05
RNU5E-1	1.33081	0.01618
SNORA61	1.3276	8.63e-05
HIVEP2	1.30309	1.25e-05
OSMR	1.28448	4.57e-06
SLCO2A1	1.2545	0.000463
ADAM19	1.25277	0.020872
ATP13A3	1.25187	0.001108
MT1A	1.24433	0.004406
POR	1.23785	0.000362
CEBPD	1.23462	3.79e-07
NEB	1.2291	0.031807
SAT1	1.22852	0.003612
IL1R2	1.2255	0.042628
RIPK2	1.2187	2.13e-05
DGKD	1.21614	0.002992
SNORA14B	1.21238	0.014417
SNORA40	1.20717	0.000856
SCARNA5	1.20408	0.00214
IL1RAP	1.19868	0.00095
ELL2P1	1.19551	0.004761
WBP5	1.19343	1.08e-05
STAT3	1.19309	6.97e-06
NAMPT	1.19257	0.000341
VCAN	1.19176	0.004546
MYC	1.18921	0.001352
TFPI2	1.18787	0.033672
RNU4ATAC	1.17826	0.005097
SNORA60	1.17132	0.008482
NR4A3	1.16593	0.023317
SERPINB1	1.16497	0.007144
SNORA4	1.16213	0.000127
RAB15	1.15282	0.005104
KCNK1	1.14026	0.006654
XIRP1	1.13524	0.021654
ELL2	1.13161	0.002423
NOX4	1.12712	0.000781
HSPA1A	1.12601	0.000881
C3orf52	1.12177	0.043877
SMAD3	1.11758	0.000429
SNORA68	1.1162	0.000686
IER3	1.09269	0.014121
PDK4	1.08907	0.002061
PPBP	1.07628	0.040042
SNORD21	1.05725	0.000396
SIK2	1.05692	2.42e-06
FCN3	1.05062	0.036306
KLHL8	1.05008	0.001436
TGM2	1.04743	0.000927
BTG2	1.04304	0.007608
SLC7A5	1.04281	0.000145
PTGIS	1.03415	0.002019
EFEMP1	1.03269	0.004406
GRAMD4	1.02859	0.032843
HRH2	1.02768	0.006569
DIAPH1	1.02139	0.000305
HVCN1	1.01549	0.002448
RN7SKP296	1.0113	0.014698
SNORD4B	1.00433	0.003421
MT1M	1.00274	0.022326
UCHL1	1.00124	0.034489
TNFAIP1	1.00104	0.000365
PACS1	0.997479	0.000413
ACTN1	0.997219	0.000927
SLC39A14	0.99219	0.007001
SERPINA1	0.987817	0.018756
FLJ42393	0.98548	0.031807
SNORA76A	0.977556	0.000568
RTN4	0.974057	0.000612
PELI1	0.970458	0.001493
SNORD80	0.969878	0.029551
SLC7A2	0.965825	0.006965
ITGA5	0.962562	0.030658
MT1P1	0.961888	0.00219
ARRDC3	0.961359	0.001773
ABCC5	0.960601	0.016782
IGF1	0.945993	0.024877
SNORA52	0.944951	0.011689
ATP2B4	0.937561	0.00617
HSD11B1	0.934256	0.001534
ERO1L	0.933575	0.010408
SSBP3	0.930158	0.000135
MAP1B	0.927394	0.000971
LDLR	0.9265	0.047028
MT2P1	0.921464	0.002274
FLOT2	0.9206	0.008677
PHLDA1	0.919407	0.003545
BCL3	0.918717	0.000578
FAM118B	0.916913	0.008909
MPZL2	0.916229	0.010547
SNORA5A	0.912613	0.001269
GABARAPL1	0.910771	1.16e-05
LINC00260	0.910363	0.03201
BEX1	0.909326	0.023706
FSTL3	0.907848	0.016697
GCA	0.907693	0.002762
IL1R1	0.907461	0.000381
SLC26A2	0.905712	0.004491
RMRP	0.904465	0.000285
SPRY1	0.903022	7.82e-05
SNORA62	0.893417	0.01665
ALPL	0.889546	0.001316
MMP8	0.886326	0.00798
SNORA64	0.880292	0.040156
GAB2	0.874312	5.93e-06
PNRC1	0.870754	2e-07
BCL6	0.867932	0.000256
MT1X	0.867145	0.029393
CIRH1A	0.866108	6.04e-05
COLQ	0.86382	0.000172
SNORA48	0.863522	0.000285
SRXN1	0.863154	0.024344
RPGR	0.862634	0.001629
FAM177A1	0.856729	0.000432
S100A11	0.856218	0.001597
NUPR1	0.855793	0.000263
B4GALT5	0.855313	0.000295
LONRF1	0.854478	0.000257
SCARNA17	0.853034	0.000718
SELM	0.853029	0.000901
PPDPF	0.852162	0.004553
MIDN	0.845593	0.000551
DDX21	0.844099	0.002703
CDK2	0.840893	0.000765
YBX3	0.838935	0.000408
SNHG12	0.835141	0.000341
NNMT	0.832313	0.00297
PLAUR	0.832089	0.018503
RNF19B	0.829934	0.0017
SNORD57	0.829231	0.024627
DNAJC12	0.82675	0.014478
SNORD68	0.82549	0.005903
FNDC3A	0.822421	0.005467
PDLIM3	0.821485	0.040626
SNORD76	0.81965	0.000237
NRBF2	0.817657	0.000336
PYGL	0.81678	0.004902
ZDHHC9	0.815172	0.01267
SNORA46	0.814868	0.002804
MVP	0.814155	0.000298
LCN2	0.810791	0.006977
FOSL2	0.804619	0.00334
TMEM176A	0.799997	0.048951
RDH10	0.798616	0.00626
CST7	0.796911	0.005767
ANGPTL4	0.794061	0.024362
ADAMTS4	0.793336	0.030972
PLOD2	0.793208	0.00907
UGCG	0.785661	0.000458
BTG1	0.783296	0.000141
CRIM1	0.77735	0.000432
PAPPA	0.775005	0.022588
MT2A	0.77457	0.005696
SEMA4B	0.772422	0.006148
PPRC1	0.763184	0.007425
IFITM1	0.762931	7.73e-05
MEIS1	0.762356	0.024016
ENO1	0.76226	0.002208
TMEM165	0.759992	0.005655
TPM3P9	0.756558	0.001142
ZDHHC2	0.755957	0.005865
CASP4	0.753541	0.000998
USP54	0.753257	0.030003
SNORA70	0.751838	0.001364
ASCC2	0.751133	0.009284
LDHA	0.749736	0.00072
ITGA3	0.7483	0.018539
PRELID1	0.744851	0.001889
THBS2	0.743235	0.008536
FNBP1L	0.7427	0.001066
SLC11A1	0.742188	0.011269
COL4A1	0.740716	0.017137
KIAA0020	0.740434	0.007436
GRAMD1A	0.737772	0.001038
TNFRSF1A	0.734095	0.000212
SERPINH1	0.732596	0.039388
RPL22L1	0.73256	0.007436
SELL	0.730013	0.029502
SLC2A13	0.729017	0.014322
IL4R	0.728917	0.001319
PAPPA-AS1	0.727715	0.036418
RALB	0.727713	0.000341
C1R	0.727509	0.002291
TP53	0.725146	0.000333
UGDH	0.724416	0.016792
PM20D2	0.722983	0.001662
NPC1	0.722187	0.002291
AQP9	0.720592	0.000439
CD55	0.718574	0.000317
IFI16	0.716709	0.00047
SP110	0.716458	0.007436
MSN	0.715703	0.026079
STOM	0.714475	6.04e-05
NRIP1	0.714215	0.00605
EOGT	0.713456	0.000432
CSF3R	0.711394	0.028945
RNY4P7	0.711307	0.002499
ACTG1	0.711098	0.001353
MCAM	0.710397	0.04343
FXYD5	0.710063	0.004428
SNORA24	0.709885	0.033357
HIPK1	0.709276	0.001861
NOD1	0.707522	0.000151
SHC1	0.705906	0.001084
SNORA13	0.70546	0.008401
JPH1	0.705016	0.038839
RNU6ATAC	0.70469	0.019165
FAM65B	0.70112	0.032426
HMGN1P36	0.70037	0.033385
NOLC1	0.698951	0.000315
CD44	0.69862	0.022588
GLRX	0.696647	0.006446
SOD2	0.696209	0.015559
AAGAB	0.695671	7.4e-05
ZNF385D	0.694846	0.039305
PLSCR1	0.694826	0.001144
SLC50A1	0.692051	0.004398
TRIM8	0.691976	0.010621
HES1	0.690394	0.001664
ZPR1	0.690159	0.004412
LPL	0.688893	0.009904
PDE8B	0.687796	0.033069
SNORD101	0.686204	0.000683
CMIP	0.685925	0.000291
SNORA20	0.684395	0.014238
TOMM34	0.682736	4.47e-05
TMEM43	0.682295	0.01936
SNORA41	0.68201	0.015049
PTPRE	0.681023	0.0036
ACKR1	0.680795	0.001897
STK17A	0.675882	0.019395
MTHFD1L	0.675681	0.000364
PECAM1	0.67391	0.000219
SLCO5A1	0.673144	0.005908
IFRD1	0.672349	0.012683
GNG10	0.672269	0.000462
GPR4	0.671069	0.029768
LRRC8D	0.670943	0.011649
ETV6	0.670805	0.001038
PNO1	0.670222	0.014087
SH3RF1	0.667597	0.00131
PPP4C	0.666845	0.000136
LXN	0.666138	0.00248
DDX23	0.665375	0.001047
YARS	0.665072	0.010517
KCTD10	0.664708	0.006462
HIF1A	0.66087	0.022548
SEC24D	0.660458	0.00519
CDH11	0.660313	0.007651
RASSF8	0.6586	0.00054
CNN3	0.657725	0.000145
PPP1R3C	0.656663	0.045845
ETV5	0.654071	0.021268
MAP3K3	0.652983	0.000854
PDE10A	0.650569	0.027458
ADAMTS1	0.648314	0.026008
ASNS	0.64807	0.017896
RAB13	0.647633	1.52e-05
SNORA71A	0.64254	0.039157
FMOD	0.64187	0.022822
AP3D1	0.641109	0.000356
SMYD4	0.63843	0.002331
RAB31	0.638306	0.000803
IGFBP4	0.637912	0.001415
CA1	0.637031	0.045518
EIF4A1	0.636027	0.011936
ANGPTL2	0.634101	0.020823
UBALD2	0.634057	0.00101
RNU6ATAC10P	0.631313	0.014974
KIAA0226	0.630626	0.008677
RELL1	0.627903	0.000365
TNIP2	0.626342	0.000292
VIMP	0.625968	0.000759
EIF2AK3	0.624821	0.038818
RNF217	0.624572	0.002967
AATF	0.623554	0.000266
PTPN1	0.621398	0.016402
MYH9	0.621273	0.036144
RNU11	0.620764	0.034086
RPA1	0.620571	6.28e-05
IMPDH2	0.618993	0.000792
PIKFYVE	0.613979	0.000135
ZNF460	0.61095	0.006141
GTF2IRD1	0.609522	0.012499
CDC42SE1	0.606086	0.001038
ABLIM2	0.603963	0.013038
GRB10	0.603769	0.003542
C5AR1	0.602699	0.019992
ODC1	0.602209	0.00109
WTAP	0.601935	0.000593
IL13RA1	0.600377	4.27e-05
STEAP1	0.600227	0.025344
MT1G	0.59955	0.047886
PITPNC1	0.598882	0.021694
ST3GAL6	0.597776	0.012459
IFITM2	0.597129	0.000196
SRPR	0.595446	0.000362
OSBPL8	0.594859	0.000283
DYNLT3	0.593737	0.004895
UPP1	0.593417	0.006317
MT1H	0.591855	0.008365
PUS7	0.59152	0.000336
MAPKAPK2	0.591243	3.25e-05
ELOVL5	0.590404	0.037425
CSNK1E	0.590197	5.82e-05
SNORA58	0.589884	0.014121
CDK17	0.5864	0.001819
TMED9	0.585642	0.002001
CCDC109B	0.5854	0.008911
ICA1	0.584271	0.01077
PPP1R18	0.583962	0.004902
ELF3	0.583921	0.036633
ZFP36L1	0.583852	0.000365
RN7SL57P	0.583832	0.03356
FLOT1	0.583486	0.000767
PHC2	0.582998	0.007097
CERK	0.582651	0.000109
ENO2	0.582215	0.02688
ARL8A	0.581347	0.000816
RN7SL141P	0.580941	0.026937
IRAK3	0.580922	0.003282
XPO6	0.580709	0.001629
EFNA1	0.580519	0.009877
YWHAH	0.57959	0.000917
LDLRAD3	0.579098	0.011047
RNF10	0.578964	0.000923
PROK2	0.578751	0.013113
PLSCR4	0.578673	0.002076
ATP1A1	0.577351	0.033377
SQRDL	0.576301	0.008101
PTGFRN	0.574849	0.000491
PFN1P2	0.574761	0.005895
ARFGAP3	0.574525	0.038958
CH25H	0.57265	0.046124
KHDRBS3	0.572316	0.000464
SNORD34	0.572037	0.020265
COL12A1	0.57062	0.031219
NSF	0.570509	0.01618
RN7SKP95	0.570055	0.023395
LINC01140	0.567899	0.029279
C4B	0.567195	0.043996
TMEM173	0.567028	0.004262
POLR3D	0.565935	0.00342
SRGN	0.565605	0.016534
DOCK4	0.565227	0.002111
LOC100131131	0.564773	0.014888
STX11	0.564678	0.002554
SNORA74A	0.564647	0.016483
ZDBF2	0.564064	0.03264
ITPRIP	0.562859	0.011802
CCNL1	0.562145	0.003386
MCTP2	0.561638	0.040626
SDF2L1	0.557125	0.007408
OSBPL6	0.555117	0.048717
C11orf96	0.5529	0.000298
ALOX5	0.552747	0.027734
AKAP6	0.54935	0.001542
FTL	0.548804	0.004963
CARM1	0.547967	0.000516
RNY4P18	0.547752	0.034212
NPLOC4	0.546998	0.000251
RCN1	0.546246	0.012212
TSPAN13	0.545712	0.025228
SNORD46	0.54507	0.037568
C12orf49	0.542576	0.002001
PAG1	0.54205	0.005289
BCOR	0.540163	0.003509
TMEM214	0.539736	0.000424
GARS	0.539183	0.024362
BAZ1A	0.538973	0.010346
DENND4A	0.538459	1.65e-06
PDE8A	0.537787	0.001269
PABPC1	0.536507	0.000176
GPR56	0.535784	0.038305
ASB12	0.533779	0.020269
IL15RA	0.533276	0.019975
IL33	0.532285	0.004284
HDGFRP3	0.531902	0.000432
TXLNA	0.531393	0.000456
A4GALT	0.53102	0.003709
YIPF1	0.529503	0.025344
DAXX	0.529232	0.019395
OR7E37P	0.52837	0.004557
PTBP1	0.525705	0.003639
SLC25A37	0.524609	0.005109
RNU6-672P	0.524285	0.013762
BACE2	0.523709	0.04319
PTMAP4	0.523195	0.000283
CTNNB1	0.522936	0.001293
WDR43	0.522648	0.016782
IFT122	0.520643	0.015049
LRRC1	0.519167	0.010075
ARF3	0.518893	0.001204
SCARNA12	0.516952	0.042736
USP22	0.515781	7.73e-05
TAF10	0.514904	0.00023
ATP11A	0.51481	0.03485
SHISA5	0.51296	0.000219
PTGIR	0.512831	0.004582
GNL3	0.51237	0.010961
GK	0.511912	0.019893
NUP188	0.511158	0.027911
CLIC1	0.510585	0.010554
TRPS1	0.510551	0.019941
ASRGL1	0.510146	0.002977
ATXN7	0.508005	0.000624
SNORD104	0.507988	0.045379
NFKBIZ	0.507354	0.034212
LARP6	0.506767	0.001454
PDPN	0.50666	0.038626
EVA1C	0.506098	0.021148
AGTRAP	0.50387	0.004231
AK2	0.503712	0.006826
BICD1	0.502957	0.000545
ARG1	0.502623	0.038225
MSMO1	0.50249	0.034212
TAF1D	0.5018	0.000842
SEC61A1	0.500224	0.043954
KIAA1430	0.499741	0.000551
PRPF19	0.497879	0.001786
R3HDM2	0.497489	0.000287
MIF	0.497371	0.006872
STX2	0.496538	0.009441
BZW1	0.496065	0.010496
SNORA71D	0.495286	0.004473
SLC9C1	0.494742	0.009231
PPP3CA	0.494726	0.010973
ASAP1	0.494359	0.008034
CLEC2B	0.492766	0.028988
RHOBTB2	0.492734	0.028237
RCL1	0.49196	0.005616
TOM1	0.491232	0.026377
INSR	0.491206	0.008175
PLVAP	0.491166	0.001828
TMEM179B	0.490199	0.006088
ADAM10	0.49016	0.001738
GNL2	0.490092	0.012367
RHOC	0.489684	0.001956
CSNK1D	0.489668	0.000101
YIPF2	0.485898	0.002967
EIF4H	0.484191	0.002171
HNRNPF	0.483011	0.002388
RNU6-1295P	0.482833	0.022205
ADSS	0.481003	0.000955
RALGAPA2	0.480935	0.027021
TKT	0.48072	0.048821
TMEM39A	0.480235	0.017007
SLC25A39	0.479808	0.000817
IFT57	0.479708	0.006896
PANX1	0.479539	0.042704
ACTR3	0.479453	0.01006
SDAD1	0.479262	0.020852
NOP58	0.479131	0.00615
TMF1	0.478882	8.72e-05
XBP1	0.478379	0.030826
DAP	0.478288	0.029905
DLL4	0.4782	0.008103
SLC25A27	0.476448	0.042912
MSTO1	0.476318	0.004448
TMBIM1	0.474969	0.005577
SUCO	0.474893	0.000767
KXD1	0.474449	0.001397
C1orf21	0.47351	0.007526
FAM160B2	0.47348	0.000292
FKBP11	0.472827	0.014041
SIRPA	0.470878	0.029237
GTF2E2	0.469901	0.018189
PRR13	0.469653	0.001482
HIAT1	0.469256	0.002167
INTS10	0.46822	0.013817
ZFC3H1	0.467901	0.000425
ZNF841	0.466248	0.035868
KSR1	0.465421	0.006872
EEF1A1	0.465137	6.37e-05
WDR3	0.464886	0.005908
IKBIP	0.463731	0.038405
FAM127C	0.46319	0.000354
RFFL	0.461861	0.000462
IL3RA	0.461443	0.012126
KIFAP3	0.460956	0.0373
GNB2	0.458434	0.001759
KLHL2	0.457404	0.000285
OR7E26P	0.456658	0.039982
SNORA67	0.456499	0.02817
NUCB1	0.456222	0.000627
FBXW5	0.454956	0.000401
RNY4P9	0.454518	0.008317
SLA	0.45305	0.049991
HIRA	0.453026	0.030786
NUDCD1	0.452664	0.034763
C16orf45	0.452286	0.001555
RAB1B	0.45204	0.018782
NABP2	0.451916	0.009018
STK3	0.450742	0.000141
NRSN2	0.449648	0.009742
ALPK1	0.449272	0.044992
FNDC3B	0.448504	0.014381
C15orf39	0.44594	0.00106
OTULIN	0.445617	0.001917
RPL3	0.445185	0.011155
TWF1	0.445073	0.005014
ARPC3	0.443152	0.010642
RIC3	0.443105	0.040674
EFHD2	0.44254	0.022326
ZYX	0.442343	0.026616
KIAA1715	0.442326	0.014472
SNORA8	0.442288	0.020532
SLC43A3	0.442205	0.020112
CHD1	0.442084	0.027698
ELTD1	0.440337	0.043997
SMC5	0.440013	0.005431
SLC3A2	0.43935	0.005222
HDAC7	0.438715	0.004116
SLC43A2	0.438012	0.009737
ZNF326	0.438001	0.039312
IFITM3	0.437833	0.002659
GPR3	0.437431	0.014641
UBE2J1	0.436619	0.029457
RBBP8	0.436279	0.008042
ZNF267	0.436241	0.008282
QPCT	0.434138	0.021361
PHF5A	0.433425	0.022578
AGO2	0.433128	0.021944
ARHGAP21	0.432787	0.026616
IRX3	0.43149	0.012348
TFPI	0.431328	0.037539
SNAP23	0.431272	0.014584
ATN1	0.431119	0.008403
C8orf33	0.430599	0.002087
ANP32A	0.430021	0.009767
SNRK	0.428691	0.023412
CDR2	0.42857	0.015794
NIFK	0.42821	0.023583
BTAF1	0.428124	0.015529
MBNL2	0.428075	0.005255
MAD2L2	0.428006	0.00543
NOS3	0.427867	0.039229
YWHAQ	0.427371	0.004423
DDX27	0.426574	0.024709
HM13	0.426157	0.010901
FAM57A	0.425874	0.045245
LRP10	0.425656	0.030697
SYNM	0.423587	0.001144
MBD1	0.423486	0.005555
LMBR1L	0.421964	0.015913
PLXNB2	0.420474	0.00403
TCF25	0.420432	0.013246
SLC9B2	0.419603	0.026394
VAMP7	0.419396	0.005655
SNORA6	0.419048	0.029668
GLI3	0.419012	0.010507
MSL1	0.418261	0.013113
SEC24A	0.418241	0.015049
MAPK1IP1L	0.417975	0.00023
SNORD36B	0.417696	0.012272
TEAD4	0.417302	0.026079
LOC100287728	0.417043	0.030826
NR1H2	0.41704	0.035908
ANP32B	0.416105	0.016612
PFN1	0.416086	0.007274
MBD2	0.415678	0.00617
TTC4	0.415597	0.014522
ZFAS1	0.415352	0.033443
RNF24	0.415323	0.005422
AGFG1	0.414372	0.002762
CBFB	0.414142	0.005844
UBE2Q1	0.413639	0.003231
HLA-J	0.412776	0.005477
TIGD7	0.412029	0.035771
RPS19BP1	0.410916	0.014272
CCNI	0.409811	0.000237
DDB1	0.409763	0.00519
RRBP1	0.408549	0.003598
LSM2	0.408404	0.012156
RRAGC	0.407476	0.045876
SH3GLB2	0.407283	0.00183
FHL3	0.406647	0.049991
RAMP1	0.406382	0.044687
PABPN1	0.406343	0.001762
SNORD54	0.405952	0.012459
NFE2L2	0.405835	0.008342
EMR2	0.404753	0.036633
RHOG	0.404383	0.001719
PCDH17	0.403416	0.032149
ARF4	0.401391	0.032833
P4HB	0.401142	0.019501
ZNF436	0.400769	0.038818
SNORD96A	0.400379	0.016318
BASP1	0.399895	0.030019
PIK3R3	0.399545	0.010978
LIMK2	0.397144	0.005908
ATP11C	0.397133	0.003933
MAP1LC3B2	0.396584	0.001866
HLA-A	0.395918	0.026735
CXCR1	0.395349	0.033554
GSTO1	0.39471	0.027911
ADIPOR2	0.394615	0.001933
CTSB	0.394151	0.024549
XPO5	0.3941	0.005598
UBA1	0.394048	0.001042
CDC14B	0.393428	0.004623
ITGB5	0.393031	0.011485
RAB35	0.392497	0.003233
DXO	0.391974	0.002233
HLA-E	0.390516	0.040491
NOC2L	0.390259	0.017878
FAM114A1	0.390126	0.041217
YEATS2	0.389918	0.012886
MCTP1	0.389677	0.034489
KCTD2	0.389209	0.032833
PARD3	0.388858	0.007561
NBR1	0.388802	0.005501
ATP9A	0.387153	0.016318
NOP14	0.386828	0.006141
PVRL2	0.386335	0.001455
AKT1	0.385909	0.01267
ERBB2IP	0.384561	0.007436
BCL7B	0.384029	0.014045
TNIP1	0.383957	0.0369
PUS3	0.383912	0.044095
MAPK3	0.383642	0.001508
SLC30A7	0.383564	0.015599
MT1IP	0.383372	0.013013
RHBDD2	0.383156	0.031558
TTF2	0.382312	0.024041
SRM	0.382309	0.003949
DNAJC2	0.382304	0.00248
DYNC1I2	0.382155	0.004647
WBP2	0.382051	0.018326
TSTA3	0.381657	0.037685
RARA	0.381638	0.003446
SETD5	0.381394	0.009552
INO80B	0.380781	0.005624
SSRP1	0.380445	0.011183
NOTCH2NL	0.379766	0.023074
WWTR1	0.379695	0.026607
FAM49B	0.379378	0.026607
FERMT2	0.379357	0.034754
TEAD3	0.379062	0.0223
POLD4	0.378873	0.024998
PRAF2	0.377716	0.013124
CYB5R3	0.377591	0.019041
RCAN2	0.377535	0.003449
RHOQP2	0.377392	0.007566
SNORD44	0.377339	0.026108
GABPB1	0.377144	0.049856
FAM50A	0.376713	0.039064
NUP98	0.376563	0.006206
RUNX1	0.375859	0.046295
LPCAT1	0.375817	0.007528
IRF2	0.375075	0.044713
RAB20	0.374943	0.032426
SFPQ	0.3745	0.031219
TMEM54	0.374061	0.018503
PTPN12	0.373213	0.009368
UIMC1	0.372698	0.011863
SEH1L	0.372628	0.048599
SAMD8	0.372074	0.009231
AKAP13	0.37192	0.005868
NOB1	0.371518	0.018921
ZNF22	0.370782	0.004277
BTG3	0.370185	0.045656
VPS54	0.370109	0.000755
NSMF	0.369725	0.00366
WDR46	0.36758	0.043376
TRMT6	0.367312	0.033005
ARHGEF12	0.367166	0.000593
VPS37A	0.367078	0.000815
SMURF2	0.366776	0.013794
TINF2	0.366555	0.028901
PKNOX1	0.366135	0.033356
VTRNA1-1	0.365905	0.043627
AUP1	0.365545	0.013311
PRMT5	0.364283	0.013094
AP3S1	0.36426	0.002192
ST6GALNAC6	0.364034	0.001629
RNU6-874P	0.363874	0.039239
SP100	0.363822	0.036951
HMBOX1	0.363729	0.017007
TWSG1	0.363261	0.014536
SRPK1	0.363127	0.002868
RBMS1	0.362746	0.022803
HHEX	0.362567	0.024677
GID8	0.362447	0.038305
FBXO7	0.362237	0.000805
STAU1	0.361463	0.001081
OTUD5	0.361452	0.00078
HDGF	0.361306	0.014767
TRPC4AP	0.36096	0.001901
PXK	0.360841	0.022657
KDM5B	0.360806	0.014194
AGPAT5	0.360712	0.020879
EIF4G3	0.360596	0.003717
TBC1D22B	0.360409	0.039804
METTL22	0.360357	0.025739
NOL8	0.35937	0.004037
ATP6V1B2	0.358928	0.005032
SNORD81	0.357841	0.010922
H3F3B	0.356475	0.023
RELA	0.3559	0.005655
RNF145	0.35552	0.03541
UBE2G2	0.355357	0.000812
UBQLN4	0.354966	0.033381
BCR	0.354554	0.02296
EIF2B4	0.35447	0.003219
HMGN1P38	0.354362	0.041382
PTK2B	0.353944	0.003655
SRSF11	0.353189	0.003071
PTMAP5	0.353082	0.007568
SERPINB8	0.352889	0.037685
BRD2	0.352666	0.003421
GALNT2	0.352434	0.00521
ALDH18A1	0.352264	0.037558
WISP2	0.352008	0.009836
TWISTNB	0.351658	0.003007
ARHGDIA	0.351457	0.049695
RNU4-24P	0.35128	0.016879
CLTB	0.350589	0.017876
TBC1D15	0.350213	0.023865
PPP2R1B	0.350105	0.031724
NMRAL1	0.349883	0.024344
ZNF609	0.349414	0.004311
IPO4	0.348925	0.024242
ZDHHC13	0.348635	0.040626
HAUS2	0.348183	0.039982
JMJD6	0.347543	0.041406
GNA15	0.347474	0.016318
RNU6-593P	0.346854	0.015002
WDR45	0.346495	0.018922
NELFCD	0.34598	0.015409
RPF1	0.344696	0.035311
HTR2B	0.344537	0.011144
PDIA5	0.344518	0.022657
PPP1R2	0.344412	0.002001
PGS1	0.343461	0.006989
CACNB1	0.342979	0.009525
DDX24	0.342492	0.020201
HLA-G	0.34236	0.006196
NAB1	0.342271	0.028454
SWAP70	0.341641	0.004716
PRKRIR	0.340361	0.046124
SLC36A4	0.340102	0.0276
GNAI3	0.339984	0.016697
SMARCC1	0.339053	0.018189
FARP2	0.338931	0.033385
MT1HL1	0.338291	0.035311
GLIS3	0.337822	0.043719
TBL1X	0.337646	0.030797
PAK2	0.336987	0.023654
STX5	0.336636	0.013913
HMGN4	0.334825	0.026647
R3HDM4	0.334732	0.014974
GDAP2	0.334496	0.001208
TMED2	0.334128	0.003502
ABCC4	0.334009	0.017158
BAG2	0.333988	0.027042
BET1L	0.333823	0.008225
CDK2AP2	0.333767	0.00549
CCNH	0.333619	0.011269
ACVR1B	0.333276	0.006271
IFNGR1	0.332892	0.028342
OXSR1	0.33191	0.031849
DRAP1	0.331498	0.029598
EIF3B	0.330811	0.00342
FAM114A2	0.33067	0.026734
EEA1	0.329242	0.017869
TXNDC5	0.328709	0.011159
FAM168B	0.328158	0.007063
MT1B	0.327689	0.035547
KIAA0556	0.326641	0.003449
MLLT6	0.326192	0.043386
KDSR	0.325276	0.029027
MTMR12	0.324844	0.014456
TMEM8A	0.32456	0.031219
MED8	0.324238	0.027493
KPNA1	0.323986	0.025346
MTR	0.323924	0.049622
TRAF7	0.323091	0.006529
STARD3NL	0.323073	0.04138
VMP1	0.322823	0.029345
FAM86FP	0.322696	0.012576
PTCH2	0.322506	0.044884
ST3GAL3	0.322323	0.043125
NMT1	0.321935	0.031296
UGGT2	0.321268	0.007124
TYMP	0.321138	0.002185
LIG3	0.320733	0.047194
TLE3	0.320426	0.021845
BAZ2A	0.32015	0.034212
FAM120AOS	0.31972	0.007001
AP2M1	0.319484	0.005898
RNF169	0.319199	0.034011
HMGN1	0.318893	0.007097
WASH1	0.317071	0.040042
SH3GL1	0.316794	0.003172
MED29	0.316675	0.001456
CUL4B	0.316156	0.004557
DICER1	0.315287	0.009605
NOP56	0.31434	0.024877
CD47	0.314183	0.034086
C1RL	0.313613	0.031296
SNORD36C	0.313334	0.002735
KCNJ15	0.313194	0.038141
STAT5B	0.312642	0.018645
HLA-B	0.312079	0.038626
C9orf16	0.311941	0.024742
GDI1	0.311167	0.018189
ASAP3	0.310623	0.011264
RPL35	0.310414	0.00378
RAPGEF6	0.310373	0.015195
RIOK3	0.310359	0.005119
RPGRIP1L	0.310118	0.018326
NUS1	0.308725	0.046493
EFEMP2	0.308719	0.010973
SCMH1	0.308207	0.001905
KIF3B	0.30766	0.034011
CCDC25	0.307533	0.014381
FBXO21	0.307424	0.035854
IRAK4	0.30695	0.014023
EMD	0.30645	0.037685
TNKS1BP1	0.306148	0.009638
HLA-C	0.305547	0.044713
CERS2	0.305543	0.010651
MDC1	0.305176	0.035986
TSHZ2	0.304832	0.041382
UHRF1BP1L	0.304514	0.016989
CMPK1	0.304032	0.019904
SAMD4B	0.303781	0.036633
FAM122B	0.303681	0.036596
ANKRD28	0.303667	0.018645
HNRNPA1P12	0.303596	0.012266
STXBP1	0.303285	0.009605
NAT9	0.303238	0.003424
SNW1	0.302234	0.009605
DDX31	0.30185	0.000317
MEAF6	0.301776	0.042058
ARMCX2	0.300554	0.01528
USP47	0.300243	0.048641
UBE2Q2	0.299364	0.016408
UBE2Z	0.29917	0.02707
SNRPA	0.299028	0.049352
GMDS	0.298339	0.01058
ILF3	0.297623	0.001316
TRIM27	0.297237	0.011144
STAM2	0.297217	0.003687
ANKLE2	0.296014	0.013781
CHD4	0.294653	0.004289
DLG5	0.294485	0.043292
MTF1	0.29402	0.011336
GSK3A	0.293836	0.009811
ZNF343	0.293588	0.023437
GOLIM4	0.293553	0.021104
WDR77	0.293304	0.040374
PYCR2	0.29221	0.014225
SLC25A6	0.292035	0.025134
MMP14	0.291869	0.03264
PSMD5	0.291845	0.032156
TCTA	0.291417	0.042582
DIP2B	0.291169	0.009907
GTPBP4	0.290948	0.030881
LRRC42	0.290808	0.047054
ZZZ3	0.290514	0.02754
ATF6	0.290435	0.032626
SNX4	0.290154	0.022877
SUN2	0.288456	0.041071
RPS2P5	0.288262	0.029357
ABHD17B	0.288207	0.022161
RNU6-643P	0.288175	0.019913
CNOT11	0.28805	0.004398
DCAF12	0.287364	0.005465
SNX11	0.287064	0.010973
CHSY1	0.286763	0.022955
DNAJC1	0.286004	0.006529
DONSON	0.285189	0.016869
ASXL1	0.284535	0.042704
SPTLC1	0.28446	0.001135
LZTR1	0.284288	0.043451
USP3	0.284171	0.012126
GNB1	0.283414	0.003175
TCEA1	0.283366	0.01913
MEF2D	0.282853	0.047522
CANT1	0.282149	0.012477
OXLD1	0.282109	0.040109
PITPNM1	0.282079	0.014276
GPR97	0.282015	0.014325
YWHAZ	0.281413	0.009525
TMEM222	0.281306	0.006051
GOLGA5	0.280757	0.017841
TRIM28	0.28058	0.016697
RSBN1	0.279887	0.008049
SEC63	0.279498	0.014139
FPR2	0.279468	0.028342
PPP1R35	0.278301	0.013206
SNORA57	0.277956	0.033196
CSNK2A2	0.277476	0.039154
SF3B2	0.27696	0.041737
RNU6ATAC3P	0.276814	0.048821
ABCF2	0.276485	0.017425
FBXL12	0.275908	0.029459
RNF40	0.275323	0.007438
DST	0.275247	0.021519
SP140L	0.27476	0.043877
HACE1	0.274731	0.04082
NCL	0.274346	0.012143
KHDRBS1	0.274236	0.012338
DGKA	0.273888	0.005735
FTH1	0.272853	0.009431
HNRNPA1	0.272343	0.034774
FKBP8	0.271649	0.048345
TCTEX1D1	0.271496	0.046012
PRKD2	0.271187	0.007436
AVL9	0.271071	0.007978
BRMS1	0.270579	0.034556
SLC41A2	0.27053	0.020511
IL18RAP	0.270471	0.012081
ASCC3	0.269086	0.038923
HK1	0.268406	0.006923
INPP5F	0.268256	0.049991
ANXA11	0.267654	0.01231
SLC25A28	0.267245	0.031355
CXCL6	0.266794	0.037685
PRDM5	0.26595	0.008909
SCN1B	0.265466	0.027842
COPE	0.265422	0.022097
EML2	0.2651	0.034489
ADAM9	0.265089	0.016092
DNAJC25-GNG10	0.264978	0.041281
ENOPH1	0.264743	0.045354
IST1	0.264137	0.021081
SNORD12C	0.263874	0.034011
CACNB3	0.263367	0.030826
CCAR1	0.262729	0.017315
NELFE	0.260288	0.016989
AHCYL1	0.259225	0.001316
CLASRP	0.259149	0.000827
KCMF1	0.258878	0.000593
SSR2	0.258841	0.049353
RBM25	0.258638	0.021638
CDC37	0.258472	0.025126
AES	0.258376	0.049991
RAB5A	0.257906	0.019605
KLC2	0.257521	0.035311
RAB11B	0.257482	0.021504
NAA50	0.25533	0.033937
ATP6AP2	0.255326	0.026895
PELP1	0.254989	0.023654
CWC25	0.254959	0.028161
STRN4	0.254896	0.013787
TSPAN3	0.254539	0.014417
MCEMP1	0.253659	0.038597
DUSP7	0.253201	0.046989
PDCD11	0.252614	0.045466
ITM2B	0.25226	0.012459
OVCA2	0.251543	0.014121
IRF2BPL	0.251494	0.039157
ABCG1	0.251233	0.032833
SLC16A5	0.250855	0.030551
TMEM160	0.250795	0.04032
SERINC2	0.250482	0.034212
RPS14P3	-0.2506	0.030786
STXBP3	-0.25076	0.048821
RBAK	-0.25106	0.034556
TOMM70A	-0.25153	0.012505
RPL13AP5	-0.25162	0.03388
SLC18B1	-0.25173	0.038074
IER3IP1	-0.25227	0.049559
OBSL1	-0.25265	0.018189
RNA5SP413	-0.2533	0.005731
SCAP	-0.25358	0.040109
MTIF3	-0.25404	0.038382
TMEM131	-0.25433	0.010883
FDPS	-0.25455	0.008216
TMBIM6	-0.25522	0.021104
CTH	-0.25562	0.034212
GLRX2	-0.2557	0.005865
RNF219	-0.25592	0.037414
ZNF66	-0.25608	0.034011
ERP29	-0.25615	0.044713
UQCRC2	-0.25666	0.039015
METTL15	-0.25718	0.042865
EXD2	-0.25816	0.004827
UQCR11	-0.2584	0.022803
NIPAL2	-0.2584	0.021896
PTEN	-0.25902	0.022161
LOC102723566	-0.25984	0.020201
NIF3L1	-0.26015	0.029305
KIAA1654	-0.26107	0.038463
SPATA24	-0.26129	0.020068
COX5A	-0.26171	0.001759
SCN3A	-0.2618	0.001905
ATP5L	-0.26231	0.004283
SLC38A4	-0.26268	0.000463
SEC11A	-0.26343	0.008619
PHOSPHO2	-0.26381	0.025392
RAB7A	-0.26381	0.012183
PKN2	-0.26389	0.043361
SNRPF	-0.26423	0.035209
HSP90AA2	-0.26482	0.040626
RMND1	-0.26517	0.026108
ZNF233	-0.26544	0.03499
RPL37AP8	-0.26576	0.024368
EIF3K	-0.26623	0.009971
SUPT7L	-0.2663	0.042628
RAPGEF1	-0.26653	0.049203
CISD1P1	-0.26749	0.000285
OCIAD1	-0.26783	0.036802
TRIM2	-0.268	0.030901
SIAH1	-0.26881	0.010972
C6orf211	-0.27033	0.037867
DENND2A	-0.27062	0.045794
CYP4F12	-0.2708	0.017425
TRAPPC12	-0.27088	0.006088
FOXN3-AS2	-0.27128	0.022649
COA7	-0.27161	0.035132
ZNF850	-0.27245	0.004883
C2orf88	-0.27252	0.005091
GNPAT	-0.27265	0.028454
CEP85L	-0.27287	0.020453
LY75-CD302	-0.27326	0.003172
MTX2	-0.27347	0.031515
LOC100128751	-0.27394	0.02873
USMG5	-0.27396	0.008088
NAA20	-0.2742	0.031003
TTC39A	-0.27438	0.047061
PSMC6	-0.27449	0.030826
PSMC2	-0.27467	0.023237
TCEANC	-0.2748	0.012762
CYTH3	-0.27485	0.007924
TMEM69	-0.27533	0.027105
AFG3L2	-0.27542	0.049072
NANOG	-0.2757	0.010456
JKAMP	-0.27598	0.038626
PCNA	-0.27605	0.03571
SPG7	-0.27637	0.018012
ASH2L	-0.27638	0.037414
RPA3	-0.27641	0.005444
GLTSCR1L	-0.27654	0.039389
MRPL11	-0.27666	0.001049
MIRLET7D	-0.27684	0.000385
BLVRB	-0.27696	0.041053
GTF2I	-0.27717	0.010301
ZNF664	-0.2772	0.016187
CENPJ	-0.27722	0.03263
PREP	-0.27848	0.04467
CCDC121	-0.27883	0.014722
COPRS	-0.27898	0.041406
PAM	-0.27899	0.019326
RABGGTB	-0.27924	0.046218
HSD17B4	-0.27932	0.027736
SCARNA22	-0.27947	0.026085
KIAA1549	-0.27976	0.010988
CCDC97	-0.27984	0.016185
ALG10B	-0.27994	0.035238
OPA1	-0.28006	0.027067
PLA2G12A	-0.28008	0.032277
FOPNL	-0.28108	0.024344
UBA3	-0.28222	0.005937
ANK1	-0.28316	0.002495
POMP	-0.28342	0.004967
TSFM	-0.28352	0.017689
ZNF605	-0.2836	0.037388
OXSM	-0.28364	0.017831
EPB41L1	-0.28379	0.001316
TUSC3	-0.28399	0.044165
TMEM220	-0.28493	0.038325
LAPTM4A	-0.28497	0.017022
ZNF280D	-0.28516	0.034754
ESRRA	-0.28524	0.04067
PRKD1	-0.28533	0.030797
THUMPD3	-0.28544	0.035274
GEMIN7	-0.28545	0.016301
ZNF383	-0.28592	0.048641
SLC41A3	-0.28652	0.033904
BPGM	-0.2866	0.021744
SMG8	-0.28674	0.035272
TXNL1	-0.28692	0.000404
COMTD1	-0.28736	0.004037
RNF14	-0.28774	0.012654
MUC3A	-0.28861	0.022117
ZNF148	-0.28915	0.00104
ISCA2	-0.28917	0.009605
CUTA	-0.2894	0.006529
ASB10	-0.28945	0.023317
PSMB6	-0.28981	0.007436
SYT13	-0.29025	0.034559
GPT	-0.29063	0.042178
PINK1	-0.29111	0.033937
COX7C	-0.29167	0.003476
NDUFC2	-0.2919	0.023865
PLN	-0.29192	0.017484
ANAPC11	-0.2922	0.006709
NUCKS1	-0.29227	0.0351
MCM3AP	-0.29248	0.048507
RAB10	-0.29255	0.008216
RNF5	-0.29283	0.010547
DNAAF2	-0.2932	0.048183
LMAN1L	-0.29345	0.000458
KCNAB2	-0.29449	0.038775
ITSN1	-0.29508	0.024344
DHPS	-0.29522	0.043308
ATRN	-0.29546	0.02305
PCP4	-0.29567	0.049818
KIAA0430	-0.29597	0.038945
MTX3	-0.29614	0.043492
IL5	-0.29683	0.027734
NPTN	-0.29692	0.005448
THEM6	-0.29709	0.003007
MRPL2	-0.2973	0.039157
RNA5SP46	-0.29766	0.043997
LSM8	-0.29826	0.037685
RGS7BP	-0.29854	0.030697
THRSP	-0.29895	0.048086
COX8A	-0.299	0.017447
DCTPP1	-0.29931	0.016782
PCMT1	-0.29944	0.005255
PPWD1	-0.29948	0.026607
MRPS16	-0.29959	0.011908
METTL18	-0.29971	0.023859
NUDT16	-0.29976	0.015839
ZNF418	-0.29982	0.024742
RMI1	-0.30041	0.007418
FAM78B	-0.30158	0.001094
SLC30A9	-0.30188	0.036987
POLR2B	-0.30196	0.004934
CALM1	-0.30196	0.001047
PCYT1A	-0.30201	0.004473
AGPAT3	-0.30208	0.005317
TSC22D1	-0.30218	0.026614
SLC38A7	-0.30225	0.020201
PSMB7	-0.30247	0.006083
PET117	-0.30252	0.003905
CHTOP	-0.30267	0.017057
ZBED5	-0.30349	0.00104
SLC35F1	-0.30378	0.000221
NDUFS4	-0.30399	0.006965
TOP2B	-0.30436	0.041564
RPL7P23	-0.30465	0.029146
ZC3HC1	-0.30501	0.002856
RBFOX2	-0.30564	0.045052
TOMM7	-0.30601	0.023868
TMEM74B	-0.30617	0.01145
HAX1	-0.30621	0.012178
LRPPRC	-0.30653	0.006191
MIR210	-0.3066	0.026008
COX6B1	-0.30661	0.000345
PHAX	-0.3067	0.012712
THUMPD1	-0.30686	0.041564
CACNA2D3	-0.3078	0.025344
C17orf80	-0.30794	0.031807
PPP1CB	-0.30814	0.007528
SMDT1	-0.30817	0.026253
NDUFB2	-0.30841	0.002017
RAC1	-0.30853	0.038461
LRBA	-0.30883	0.025908
ALG11	-0.30927	0.038479
RNF170	-0.30934	0.045245
NAGK	-0.30938	0.02163
SLC25A36	-0.30966	0.027766
TRUB2	-0.30981	0.013913
LPAR5	-0.3099	0.00541
HMBS	-0.31042	0.02809
ABHD13	-0.31103	0.007925
FBXO34	-0.31151	0.023924
TSPAN6	-0.31183	0.043212
DLC1	-0.31212	0.027549
C1orf115	-0.31228	0.029913
PSMA6	-0.31236	0.005996
HIP1	-0.31252	0.044223
ELP5	-0.31272	0.004911
DCTN3	-0.31294	0.009018
CUL4A	-0.31348	0.030582
ARHGAP19	-0.31429	0.000812
TOB2P1	-0.31437	0.00182
ZNF135	-0.31451	0.029237
HYAL1	-0.31478	0.001889
MXD4	-0.31488	0.013656
LINC00478	-0.3154	0.001886
MRPL30	-0.31558	0.022914
GPR89A	-0.31563	0.003216
ZMYM3	-0.31602	0.023654
RN7SL55P	-0.31654	0.024373
C11orf21	-0.31709	0.029459
TIMM44	-0.31714	0.009395
PP7080	-0.31719	0.041853
RNF207	-0.31748	0.007357
ATP5J2	-0.31774	0.001936
GLYR1	-0.31776	0.023914
ZNF252P	-0.31807	0.038305
GALM	-0.31874	0.026695
UQCRFS1	-0.31883	0.03722
TMLHE	-0.3189	0.034489
INIP	-0.31978	0.021081
ZNHIT3	-0.3199	0.029094
MIR199A2	-0.31997	0.000341
RNF114	-0.32155	0.005104
LAMTOR5P1	-0.32184	0.015563
FAM192A	-0.32231	0.007634
SUCLG1	-0.32274	0.005395
RN7SL800P	-0.32295	0.01468
ZNF669	-0.32318	0.023016
PPIL2	-0.32327	0.038405
TMEM251	-0.32373	0.028945
EI24	-0.32374	5.24e-05
LIN52	-0.32386	0.018437
GRSF1	-0.32446	0.00268
PQLC3	-0.32497	0.021081
RBL1	-0.32528	0.00617
CRLS1	-0.32598	0.01581
OPN1SW	-0.32599	0.007494
GNAI1	-0.32618	0.049646
MGST3	-0.32627	0.024469
DCUN1D5	-0.3264	0.023455
ANKRD6	-0.32694	0.016333
RBX1	-0.32715	0.007436
SP4	-0.32779	0.024955
RN7SKP124	-0.32786	0.001897
DHRS11	-0.32787	0.049404
CTNNBIP1	-0.32871	0.005844
DNAJC15	-0.32881	0.002857
KBTBD7	-0.32908	0.004623
SNRPGP10	-0.32956	0.015259
HARS2	-0.32966	0.033732
ZSCAN26	-0.33023	0.008622
PPAP2B	-0.33024	0.047621
GPN3	-0.33033	0.039514
CREB1	-0.33033	0.033005
UBE2A	-0.33048	0.022803
LSS	-0.33053	0.049631
ATE1	-0.33088	0.011074
TIMM13	-0.33125	0.009667
UNC50	-0.3313	0.006153
TMEM194A	-0.33156	0.004412
GATA2	-0.33214	0.007792
C14orf2	-0.33231	0.007309
PCDH12	-0.33266	0.012625
DHRS4L2	-0.33278	0.036536
DPP8	-0.33284	0.031226
MIR365A	-0.33304	0.001575
TSEN2	-0.33308	0.009161
HPGDS	-0.33319	0.036633
MTM1	-0.33353	0.011861
GRAMD3	-0.33367	0.014729
ADK	-0.33417	0.046202
LZIC	-0.33428	0.043129
SLC25A33	-0.33451	0.004428
DBI	-0.33464	0.019864
CDK19	-0.33488	0.004616
YTHDF3	-0.33542	0.015094
SENP8	-0.33546	0.002635
KRTAP10-2	-0.33547	0.009525
PPIF	-0.33556	0.025962
ADCK2	-0.33574	0.029899
AURKA	-0.33588	0.019395
BBS10	-0.33602	0.008226
POP4	-0.33621	0.024373
AFF3	-0.33663	0.000147
SRP9	-0.33734	0.007694
FAU	-0.33744	0.003616
NOL7	-0.33801	0.004546
C8orf37	-0.33839	0.001886
SH3D19	-0.33857	0.037867
CBWD5	-0.33867	0.013787
N6AMT1	-0.3387	0.026695
LMBR1	-0.33893	0.038382
BCS1L	-0.33975	0.001038
MRPS18B	-0.33981	0.001962
KIAA0196	-0.34011	0.015314
HCCS	-0.34016	0.023732
VWC2	-0.34024	0.011674
SEC61A2	-0.34116	0.021081
RNU6-341P	-0.34143	0.018926
RN7SL526P	-0.34153	0.004289
KCTD9	-0.34196	0.037882
MPC2	-0.34239	0.048925
HDDC3	-0.34261	0.005987
POLR3B	-0.34274	0.037
C7orf13	-0.34298	0.001353
DUSP10	-0.34354	0.018246
ARHGEF25	-0.34356	0.002076
CHURC1-FNTB	-0.34365	0.007978
UQCRBP1	-0.34453	0.003732
KLRG1	-0.34458	0.037932
C6orf57	-0.34496	0.042627
F10	-0.34536	0.028185
CMTR1	-0.34536	0.021519
MEIS3	-0.3454	0.0114
SMC4	-0.34557	0.010445
TRIM23	-0.34578	0.010777
MIR29B2	-0.34579	0.001093
SKA2	-0.34585	0.008049
SIRT4	-0.34614	0.002534
COX14	-0.34664	0.021803
RNF103	-0.34669	0.047194
METAP1	-0.34694	0.006551
MIR32	-0.34733	0.001819
DZIP3	-0.3478	0.039939
GALNT11	-0.34819	0.035624
MRPL15	-0.34823	0.020453
ST3GAL5	-0.34898	0.010346
VIPR1	-0.34899	0.000718
SYT7	-0.3491	0.017614
ASB1	-0.34924	0.013132
COX4I1	-0.34982	0.004399
FOXN3	-0.34985	0.003732
SPIN1	-0.35114	0.015888
ORC2	-0.35171	0.034212
PEPD	-0.35172	0.02267
IFT81	-0.35181	0.036987
MIR1247	-0.35268	0.00048
PDGFRL	-0.35273	0.037589
ASB7	-0.35276	0.001641
ZNF808	-0.35292	0.003022
EIF3M	-0.35304	0.000854
MCC	-0.35333	0.042736
IDI2	-0.35338	0.001074
CXorf40B	-0.35361	0.028737
COX11	-0.3542	0.041768
FZD4	-0.35439	0.019819
SLC25A24	-0.35445	0.00519
MGST2	-0.35446	0.017263
RPRD2	-0.35467	0.01975
SLC25A4	-0.35498	0.01659
SLC35A4	-0.35524	0.032426
BAIAP2	-0.3553	0.002
FAM210A	-0.35555	0.001719
COX6C	-0.35557	0.021032
MCM4	-0.35627	0.011144
CWC15	-0.35638	0.033357
EPN3	-0.35679	0.000614
DNAJA3	-0.35687	0.005431
YIPF5	-0.35737	0.007476
DGAT2	-0.3577	0.001786
ZNF626	-0.35777	0.002762
MINOS1	-0.3578	0.024895
PPID	-0.35802	0.018921
PDHX	-0.35817	0.023276
RPL39L	-0.3583	0.023924
OXNAD1	-0.35877	0.006036
POLR2F	-0.35906	0.009836
SCN4B	-0.35938	0.010972
TMEM184C	-0.35989	0.006529
ZNF559	-0.36049	0.029981
MTRF1	-0.36091	0.002001
ASCC1	-0.36105	0.002306
EREG	-0.36123	0.032392
ATP1B2	-0.36197	0.013897
FUNDC1	-0.36221	0.042178
TIMM23B	-0.36244	0.008342
WLS	-0.36285	0.042582
TMEM19	-0.3636	0.006141
EGFLAM	-0.36368	0.006317
EXOC6	-0.36379	0.021081
MRPL45	-0.36412	0.039504
LACE1	-0.36418	0.004758
PLA2G4C	-0.36491	0.033191
CLCN4	-0.36511	0.001538
SFT2D2	-0.36562	0.026682
IKZF5	-0.36563	0.009241
CBLL1	-0.36573	0.002186
ADD3	-0.3658	0.006826
GPR17	-0.36647	0.029237
ENPP1	-0.36648	0.000896
UBR3	-0.36697	0.001534
SUB1	-0.367	0.010456
WDR62	-0.3675	1.79e-05
ZNF770	-0.36763	0.001928
PLEKHF2	-0.36764	0.046451
PSMB5	-0.36765	0.012654
TNS3	-0.36789	0.008523
MYOC	-0.36823	0.000429
TAS2R14	-0.36824	0.007754
HTATSF1	-0.3685	0.043376
KCNMB2	-0.36858	0.002888
COQ6	-0.36861	0.018645
SUCLG2	-0.36904	0.042736
DYNC1LI1	-0.36923	0.005222
FAM173B	-0.36933	0.028715
GCSH	-0.36958	0.018645
AIMP2	-0.3698	0.004443
AKAP9	-0.3703	0.042246
CTCF	-0.3706	0.009045
MYL9	-0.3707	0.023654
SCRN3	-0.37073	0.048945
TCAIM	-0.37077	0.004321
PDE9A	-0.37081	0.00263
FBXO42	-0.37301	0.039982
EEF2K	-0.37354	0.015559
TDRD1	-0.37364	0.000221
ITGA11	-0.37434	0.029356
CACYBP	-0.37473	0.012683
MTUS2-AS1	-0.37493	0.018645
ASPH	-0.37497	0.004883
DCTN4	-0.37687	0.004761
FKBP3	-0.37688	0.004399
CLOCK	-0.37689	0.018454
CYP20A1	-0.37717	0.001621
SOX5	-0.37721	0.000627
RBM41	-0.37806	0.0017
ZHX2	-0.37808	0.019361
TRAK2	-0.37822	0.030084
PLEKHJ1	-0.37828	0.009922
KCNB1	-0.37847	0.007785
DNAJB6	-0.37864	0.028018
ATP5B	-0.37912	0.001629
PIGP	-0.37913	0.027581
PARP1	-0.37915	0.010901
CYCS	-0.38067	0.000735
SDHB	-0.38083	0.004902
SPDYE9P	-0.38129	0.042482
WDSUB1	-0.38173	0.002823
NDUFV2	-0.38174	0.002001
GEN1	-0.38203	0.00617
C2orf47	-0.38206	0.002264
NCOA3	-0.3821	0.004872
AKR7A2	-0.38237	0.010849
ADCYAP1R1	-0.38268	0.004446
MIR181B1	-0.38275	0.002799
DAAM2	-0.38318	0.015186
ENTPD6	-0.38333	0.008247
PTH1R	-0.38338	0.000913
MYOZ2	-0.38381	0.010647
FXYD6	-0.38405	0.024016
ECM2	-0.38441	0.029614
FDX1	-0.38469	0.003949
EPM2A	-0.38477	0.001859
SPDYE8P	-0.38477	0.034598
UBN1	-0.38487	0.021638
SNORD59A	-0.38498	0.00617
SNX13	-0.38509	0.002799
PPP1R12B	-0.38527	0.045458
APOBEC3C	-0.38574	0.001629
ISCA1	-0.38626	0.002525
GPR52	-0.3864	0.013132
PRDX5	-0.38641	0.00039
ATP5J	-0.38676	0.000786
SYNJ2BP	-0.38721	0.015341
DBT	-0.38721	0.022803
NDUFA2	-0.38721	0.024742
DNAJC28	-0.38748	0.006036
OLFML2A	-0.38758	0.010275
PCMTD2	-0.38759	0.028829
DIS3L	-0.38833	0.017425
ZNF680	-0.38854	0.035908
PKD1L1	-0.38862	0.00525
MIRLET7C	-0.38896	0.003997
LOC100129572	-0.38898	0.001886
NFIX	-0.38936	0.030609
OSBPL11	-0.38965	0.021903
NDUFS2	-0.39002	0.001641
ESD	-0.39032	0.000951
RNU6-623P	-0.39048	0.008909
TAF13	-0.39136	0.021081
KRBOX4	-0.39168	0.015308
NUDT16L1	-0.39173	0.007438
SEPW1	-0.39213	0.002328
HOMER1	-0.39305	0.022543
REEP1	-0.39312	0.024362
UROD	-0.39351	0.026079
RNU6-564P	-0.39383	0.013691
ZNF768	-0.39422	0.002538
TMEM14B	-0.39426	0.036024
ILVBL	-0.39443	0.021519
EIF1AX	-0.39472	0.014023
CDON	-0.3949	0.002762
SCOC	-0.39628	0.004811
PXMP4	-0.39638	0.022644
MRPL41	-0.39641	0.004546
PPARG	-0.39667	0.016258
SLC25A3	-0.39729	0.001767
AHSA1	-0.39788	0.014417
RNA5SP194	-0.39798	0.015531
MED11	-0.39821	0.006923
TEAD1	-0.3984	0.003732
CKMT2	-0.39858	0.008677
DPY19L2P2	-0.39867	0.028018
CBX5	-0.39917	0.002499
IQSEC1	-0.39935	0.034409
GTF3C6	-0.39936	0.046451
LMO7	-0.39952	0.011393
CNTN3	-0.39992	0.016337
LINC00216	-0.4003	0.036554
NDUFA5	-0.40057	0.03948
UCHL5	-0.40081	0.000881
POLR3K	-0.40131	0.001999
LCLAT1	-0.40157	0.036439
MGLL	-0.40161	0.02788
BTBD3	-0.40165	0.008677
GSTM5P1	-0.40175	0.010845
RUNX1T1	-0.40237	0.046915
NDUFS1	-0.40244	0.007857
REV1	-0.40253	0.000379
FARS2	-0.40262	0.002762
KIAA0232	-0.40292	0.000391
TMEM14C	-0.40327	0.029606
SRGAP3	-0.40351	0.014472
NNT	-0.40369	0.015314
GOT2	-0.40485	0.009804
KIAA1671	-0.40506	0.015559
UQCC1	-0.40555	0.00617
MARK3	-0.40564	0.035272
MIR28	-0.40581	0.004428
FAM110B	-0.40597	0.000782
ARMCX3	-0.40598	0.00345
RNF146	-0.40664	0.013336
SERTM1	-0.40667	0.004344
SMTN	-0.40675	0.040626
RAVER2	-0.40688	0.007528
FTH1P4	-0.40708	0.017425
LAPTM4B	-0.40717	0.013113
PLD6	-0.40724	0.017439
CPT1B	-0.40751	0.006742
APBB2	-0.40752	0.039791
PIN4	-0.40753	0.006271
ICT1	-0.40861	0.012162
EIF3KP1	-0.40864	0.009907
TRUB1	-0.40883	0.017904
DAG1	-0.40897	0.031558
FGFR1	-0.40938	0.009002
IDH3B	-0.4095	0.003022
ADH5P4	-0.40963	0.002857
TMEM199	-0.4109	0.017735
ACADS	-0.41118	0.005653
THRB	-0.41159	0.013311
TMX4	-0.41167	0.013132
TPRKB	-0.41177	0.010403
NDRG4	-0.41203	0.033385
ZYG11B	-0.41222	0.000786
ZNF93	-0.4125	0.000933
EPHX1	-0.41279	0.046124
MYEOV2	-0.4137	0.001612
PLCD3	-0.41419	0.017781
C11orf71	-0.4143	0.024373
MFSD11	-0.41446	0.000733
ZBTB40	-0.41465	0.008779
PMPCB	-0.41482	0.013246
MPC1	-0.41495	0.046031
TPPP	-0.41573	0.003997
NINL	-0.41582	0.001038
ACADM	-0.41592	0.02627
SLC26A10	-0.41607	0.014139
SNORD82	-0.41691	0.006354
ZNF438	-0.41694	0.003939
FAM122A	-0.417	0.002415
KCNN2	-0.41707	5.6e-05
C18orf25	-0.4177	0.001936
SMIM20	-0.41823	0.03541
PRADC1	-0.41834	0.009083
TBC1D14	-0.41853	0.001479
SGCD	-0.4192	0.037827
GSTK1	-0.41924	0.015032
TNAP	-0.41926	0.023654
NDUFS6	-0.4194	0.009368
SYTL3	-0.41964	0.009002
MT-TF	-0.42009	0.012494
UBAC1	-0.42016	0.000792
CLASP2	-0.42023	0.048908
NUDT13	-0.42045	0.012902
ACSS1	-0.42088	0.019989
TOMM22	-0.42102	0.002328
IMP3	-0.42115	1.69e-05
ANAPC15	-0.42139	0.038382
RPS13	-0.42202	0.015411
COX5B	-0.42207	0.003536
PRDX3	-0.42231	0.003044
MICU1	-0.42251	0.000718
CLASP1	-0.42272	0.009453
HEATR6	-0.42277	0.010901
INMT	-0.42278	0.014888
RN7SL338P	-0.4256	0.014276
NDUFS8	-0.42661	0.00183
PCCA	-0.42707	0.026079
TMEM47	-0.42731	0.035384
INPP5J	-0.42744	0.043129
DLD	-0.42758	0.005448
STAG3L3	-0.42761	0.014698
PSMA2	-0.42783	0.006413
SNRPG	-0.42804	0.000313
SOS2	-0.42947	0.001641
TFAM	-0.42957	0.001928
ARL6IP5	-0.42962	0.001138
RPL21P11	-0.42997	0.006989
MALSU1	-0.43076	0.001928
TMEM242	-0.43102	0.015032
C10orf32	-0.43183	0.003216
KLHDC3	-0.43333	0.040179
WBP4	-0.43357	0.006529
TMEM189	-0.43374	0.002845
ORC4	-0.43405	0.00214
CRLF3	-0.43411	0.002167
PMP22	-0.43457	0.013223
MRPS36	-0.43571	0.024041
MRPS17	-0.4362	0.003732
SCPEP1	-0.43652	0.036951
AIFM1	-0.43654	0.000518
MEGF8	-0.43662	0.006102
YIPF4	-0.43705	0.000177
TSPAN14	-0.43708	0.016936
HIGD1A	-0.4373	0.011264
ZHX3	-0.43775	0.000341
FAM220A	-0.4383	0.003493
CELF2	-0.43887	0.011144
IGSF5	-0.43948	0.009907
UPRT	-0.43964	0.008077
RN7SKP269	-0.44045	0.004902
EPS15L1	-0.44063	0.028018
AGTR1	-0.44078	0.000263
STARD13	-0.44107	0.039248
GHR	-0.44264	0.014194
RNA5SP185	-0.44334	0.005642
MEOX2	-0.44344	0.048086
MRPS23	-0.44362	0.039574
EMC6	-0.4437	0.007144
IRAK1BP1	-0.44382	0.009535
LAMTOR5	-0.44415	0.000612
DDTL	-0.44453	0.040626
ATPAF2	-0.44458	0.002637
NEO1	-0.4448	0.009431
DLEU1	-0.44492	0.004902
ZNF283	-0.44575	0.003282
FAM96A	-0.44628	0.000628
NDUFAF4	-0.44666	0.000829
GUCY1B3	-0.44668	0.001936
CERS6	-0.44699	0.009969
COQ7	-0.4478	0.014124
LPHN1	-0.44869	0.001905
SNRNP25	-0.449	0.000425
NPY6R	-0.44958	0.022063
DTWD2	-0.4506	0.025393
SDHAP1	-0.45062	0.009971
DSTN	-0.45118	0.000976
ZNF542P	-0.4512	0.013037
PDPK1	-0.45138	0.019611
LANCL2	-0.45175	0.003311
QDPR	-0.45175	0.018645
GBAS	-0.45333	0.023583
LNX1	-0.45346	0.000663
ECH1	-0.45384	0.005096
CUL5	-0.45409	0.000432
NFYC	-0.45425	0.004783
SSNA1	-0.45459	0.000251
THAP6	-0.45506	0.012525
CISD1	-0.45543	0.000423
MRS2	-0.45554	0.014745
MRPL33	-0.45596	0.000995
TMEM135	-0.45601	0.012043
FNIP1	-0.45629	0.006102
TFDP1	-0.45658	0.000208
ZNF431	-0.45697	0.002308
BVES	-0.45737	0.030344
FHL2	-0.45754	0.045152
C14orf142	-0.45794	0.009405
YIPF6	-0.45801	0.002868
MRPS30	-0.45838	0.000363
LIAS	-0.45912	0.024344
PTGR2	-0.45922	0.014606
HEXIM1	-0.45963	0.001038
RORB	-0.46011	0.001232
ATP5G3	-0.46015	8.59e-05
NUDT8	-0.46096	0.045458
MAF	-0.46189	0.006036
ABR	-0.46226	0.038314
CDC26	-0.46425	0.006146
TNRC6B	-0.46472	0.00521
ACVR2A	-0.46482	0.000356
ZNF684	-0.46483	0.003022
NUDT3	-0.46494	0.006863
QRSL1	-0.46522	0.016603
FBXO3	-0.4654	0.002762
SPOP	-0.46553	0.000106
MLYCD	-0.4662	0.03828
COPZ1	-0.46658	0.015559
CCDC58	-0.46676	0.002495
CDH13	-0.46692	0.018797
ELMO1	-0.46789	0.010124
TIMP3	-0.46851	0.022578
PTCD2	-0.46912	0.02731
TTC1	-0.46913	0.001719
GTF2A2	-0.47	0.009309
NDUFC1	-0.47003	0.002444
STRBP	-0.47018	0.01995
NDUFS7	-0.47098	0.038325
SLC25A11	-0.47191	0.04981
ZSWIM1	-0.47202	0.001897
MMP15	-0.47214	0.000359
KBTBD6	-0.47257	0.000163
ACAA2	-0.47304	0.001676
AGK	-0.47316	0.001355
PMVK	-0.47341	0.000544
URGCP-MRPS24	-0.4736	0.002244
C14orf37	-0.4738	0.018719
PPARGC1B	-0.47389	0.001756
MRPL44	-0.47394	0.000747
CPAMD8	-0.47397	0.000109
SUN1	-0.47428	0.00295
COX7A2	-0.47441	0.00241
NUDT6	-0.4747	0.000356
ING3	-0.47583	0.003768
FAM26E	-0.47626	0.009525
COX17	-0.47688	0.004082
TUBA3C	-0.47793	0.004399
RNU6-711P	-0.47824	0.006565
EGFR	-0.47834	0.002017
MIRLET7G	-0.48009	1.79e-05
MRPS10	-0.48045	0.000356
ACAT1	-0.48143	0.006141
THRA	-0.48228	0.03948
RNU6-171P	-0.48234	0.016164
MTERF2	-0.48246	0.001603
PARP2	-0.4825	0.000494
VTRNA1-3	-0.48256	0.034754
FH	-0.48263	0.00167
TNFRSF21	-0.48304	0.001534
MKKS	-0.48309	0.001248
SLC38A11	-0.48439	0.007583
SLIRP	-0.48441	0.006081
METTL25	-0.48479	0.001776
CMC2	-0.48532	0.003369
LIFR	-0.48567	0.013922
CPEB3	-0.48571	0.023868
SCP2	-0.48598	0.008779
BLCAP	-0.48709	0.002091
PCDHB5	-0.48746	0.014147
SNRPC	-0.48774	0.001889
RPL3L	-0.48787	0.029899
DET1	-0.48802	0.001928
CIPC	-0.48869	0.000462
MT3	-0.48901	0.039514
EXOG	-0.48939	0.005589
TBX3	-0.4894	0.009788
C19orf33	-0.48954	0.03356
LRRC37A16P	-0.49007	0.002429
KIAA1586	-0.49015	0.03264
COA1	-0.49087	0.009441
ERMP1	-0.49094	0.027594
GHITM	-0.49115	0.001863
CYP4Z2P	-0.4912	0.013884
NTPCR	-0.49209	0.000862
QARS	-0.49294	0.003175
SLC38A3	-0.49373	0.039389
ERVMER34-1	-0.49431	0.000639
TPSAB1	-0.49433	0.001374
AASDHPPT	-0.49467	0.000792
BCKDHB	-0.49469	0.042704
ALKBH7	-0.4949	0.002736
FGF18	-0.49516	0.006529
LSM3	-0.49519	0.00673
IGKV1D-16	-0.49548	0.031664
ATP5A1	-0.49567	0.004284
YEATS4	-0.49575	0.004557
KAL1	-0.49675	0.00094
ERI2	-0.49777	0.000397
NDUFS3	-0.49795	0.000761
CLCN3	-0.4982	0.018842
STRADB	-0.49984	0.001238
NDUFB9	-0.50031	0.001108
ADH5	-0.50046	0.007144
HDHD2	-0.5008	0.001269
C6orf136	-0.50194	0.001304
PPAPDC3	-0.502	0.011144
COX10	-0.5029	0.009605
PTER	-0.50408	0.006635
DECR1	-0.50466	0.000998
CAT	-0.50475	0.011929
CLYBL	-0.5049	0.016697
SYNJ2BP-COX16	-0.50512	0.003449
GLRX5	-0.50566	0.001321
RPP25L	-0.50617	0.002762
TIMM22	-0.5065	0.000751
TEFM	-0.50777	0.009783
RN7SL76P	-0.50797	0.000316
ANKRD20A12P	-0.50863	0.016196
ZNF780B	-0.50898	0.011677
CMC1	-0.50906	4.85e-05
GAS2	-0.50922	0.03171
RNU6-957P	-0.51019	0.0369
GPR116	-0.51396	0.002845
LSM6	-0.51412	0.000445
PKP2	-0.5147	0.012683
RCBTB2	-0.51513	0.009904
SDHA	-0.51519	0.008375
LOC101928673	-0.5156	0.031793
ACKR4	-0.51599	0.015593
NMNAT1	-0.51668	0.000463
ARL6IP1	-0.51687	0.030344
TMEM38A	-0.51789	0.023276
UACA	-0.51822	0.028642
SLC16A10	-0.51849	0.00519
MIR214	-0.51852	0.000109
SLC25A12	-0.51909	0.025514
SLMAP	-0.51916	0.000332
ARHGAP10	-0.51926	0.002185
MMACHC	-0.52	0.005948
CPT2	-0.52018	0.042521
ZNF486	-0.52049	0.004497
MCCC1	-0.52156	0.003135
CTSH	-0.52322	0.007792
MRPS7	-0.52385	0.00104
SUOX	-0.52614	0.000614
PCDH7	-0.52635	0.012654
COMMD3	-0.52673	0.000315
PIP5K1B	-0.52692	0.015341
NCALD	-0.52724	0.000262
IPO11	-0.52778	0.000347
IGSF10	-0.52784	0.009161
CADPS2	-0.52881	0.005091
DDO	-0.52882	0.005418
HSD17B8	-0.52959	0.027504
KCNRG	-0.52986	0.013366
SAT2	-0.5307	0.000546
TSC1	-0.53149	0.000723
LPIN1	-0.53209	0.016752
ZNF622	-0.53214	0.012683
GSTM2	-0.53232	0.023567
C15orf61	-0.53249	0.013763
PAQR9	-0.53344	0.0007
JARID2	-0.53368	0.000416
MIR143	-0.53446	2.01e-05
PPARA	-0.53467	0.006206
SMPX	-0.53564	0.004412
RCHY1	-0.53566	0.000315
MRPL27	-0.53594	0.000621
APCDD1	-0.53611	0.042994
C1orf192	-0.53637	0.003709
RN7SL801P	-0.53642	0.005939
MLH1	-0.53675	0.000433
BTNL9	-0.53745	0.002771
HAND2	-0.53849	0.004557
SLC29A1	-0.53932	0.007148
PTPRB	-0.54001	0.004412
TUBE1	-0.54061	0.005463
FITM1	-0.54133	0.007229
ZNF181	-0.54148	0.001085
ACTC1	-0.54177	0.006984
ITM2A	-0.54177	0.022574
ZNF189	-0.54245	0.042736
HOGA1	-0.54282	0.01409
VBP1	-0.54309	0.000923
PTPN4	-0.54389	8.72e-05
CCDC146	-0.54473	0.006965
CS	-0.54593	0.002771
EIF1B	-0.54628	0.004187
TMEM261	-0.54649	0.004716
TMEM99	-0.54657	0.001008
TNRC6A	-0.54776	0.000754
NCOA4	-0.54863	4.28e-05
RN7SL600P	-0.54867	0.000686
RGS6	-0.5489	0.02001
SUCLA2	-0.54891	0.004716
GRB14	-0.54927	0.018326
NET1	-0.54991	0.000172
PPP3CB	-0.55008	0.00034
CCDC68	-0.55112	0.011144
ZFPM2	-0.55113	0.000537
LINC00998	-0.55117	0.013913
RPS15AP1	-0.55136	0.011689
ST8SIA6	-0.55204	0.014094
RNA5SP172	-0.5532	0.012213
LIN9	-0.55366	0.034212
RNU6-409P	-0.55424	0.000712
GTPBP8	-0.5555	0.000292
EPB41L4B	-0.55594	0.00378
HIGD2A	-0.55639	0.000221
LEO1	-0.55799	0.007785
ZNF521	-0.55894	0.010689
HEATR5B	-0.55896	0.001531
RN7SKP69	-0.55935	0.003475
ME2	-0.56021	0.00243
TP53INP1	-0.56123	0.022493
CD38	-0.5614	0.036645
ACOT13	-0.56258	0.000135
SLC29A2	-0.5628	0.000494
NUBPL	-0.56318	0.029612
MRPL48	-0.56457	0.000333
SLC20A2	-0.56465	0.027415
KLF13	-0.56512	2.01e-05
ZFX	-0.56539	0.021902
SLC41A1	-0.56717	0.021584
LAMTOR3	-0.56769	0.000236
MRPL39	-0.56785	0.000288
IMPA2	-0.56816	0.001369
MAPRE2	-0.56888	0.012599
EBF3	-0.56939	0.001812
CD300LG	-0.57016	0.026734
GIN1	-0.57042	0.001719
NDUFB6	-0.57065	0.001293
BCL11A	-0.57111	0.001285
CYC1	-0.57147	0.000262
DPP4	-0.57189	0.044992
NDRG3	-0.57222	0.004934
ZFP3	-0.57306	4.57e-06
SH3KBP1	-0.57436	0.006036
UBOX5	-0.57455	2.8e-06
KAT6B	-0.57666	0.001038
ALDOC	-0.57801	0.007908
APOOL	-0.57802	0.000456
LEAP2	-0.57852	0.001319
GLCE	-0.57946	0.000262
TLN2	-0.58052	0.002023
FRMD3	-0.58158	0.001025
JAK2	-0.58263	0.03625
MFSD1	-0.58378	0.001531
GM2A	-0.5843	0.001415
IGKV1OR9-1	-0.58431	0.008282
UQCRHL	-0.58449	0.000612
COA6	-0.58456	0.009126
EPB41L2	-0.58461	0.008175
MUT	-0.58466	0.008909
ATXN7L3B	-0.58514	0.000326
METTL7A	-0.58522	0.002973
PET112	-0.58593	0.005091
TRMT61B	-0.58634	0.005501
NR1D2	-0.58641	0.049767
KLF12	-0.58707	0.006317
IP6K2	-0.58817	0.002967
SMIM11	-0.58855	0.004303
DLAT	-0.58968	0.000257
KCNJ8	-0.5897	0.007726
RBP4	-0.59242	0.003192
INSIG2	-0.59271	0.004406
SDHD	-0.59397	0.000408
PPP1R13B	-0.59658	0.015563
SEMA3C	-0.59799	0.003316
MRPL35	-0.59838	0.000102
COX7B	-0.59871	0.038553
TMEM14A	-0.59991	0.012988
ANO5	-0.6001	0.002331
[truncated: 318 more rows]

## Sheet: Table S4 Identified DEFRGs in G
Table S4 Identified DEFRGs in GSE79962
ACVR1B
AGPAT3
ALOX5
ARRDC3
ASNS
AURKA
BRD2
CD44
CISD1
CP
CS
CTSB
DECR1
DLD
DNAJB6
DPP4
EGFR
ELOVL5
FH
FNDC5
FTH1
FTL
GABARAPL1
GABPB1
GLRX5
HAMP
HDDC3
HIF1A
HILPDA
IL33
LIG3
LPIN1
MAPK3
MIR214
MT1G
MT3
MTF1
NCOA3
NCOA4
NFE2L2
NNMT
NOX4
NR1D2
OXSR1
P4HB
PANX1
PLIN2
POR
PPARA
PTEN
RELA
SAT1
SCD
SCP2
SLC25A28
SLC2A12
SLC2A3
SLC39A14
SLC3A2
SLC7A5
SNX4
SRXN1
STAT3
TFAM
TP53
TSC1
TUBE1
WWTR1
XBP1
ZFAS1
ZFP36

## Sheet: Table S5 Potential therapeutic 
Table S5 Potential therapeutic drugs of SMI predicted using the DSigDB database
Drugs	P-value	Adjusted P-value	Odds Ratio	Combined Score	Genes
resveratrol CTD 00002483	1.66e-09	1.01e-07	147192	2975802	STAT3;PTEN;NOX4;PPARA;HIF1A;TP53;RELA;MAPK3
7646-79-9 CTD 00000928	3.25e-07	5.2e-06	135248	2020322	STAT3;PTEN;NOX4;PPARA;HIF1A;TP53;RELA;MAPK3
1,9-Pyrazoloanthrone CTD 00003948	3.51e-14	5.78e-11	797.276	24699.6	STAT3;PTEN;PPARA;HIF1A;TP53;RELA;MAPK3
Andrographolide CTD 00001445	2.01e-12	8.28e-10	875.175	23570	STAT3;HIF1A;TP53;RELA;MAPK3
Alpinumisoflavone CTD 00000003	1.53e-08	4.92e-07	1089.87	19615.8	STAT3;HIF1A;RELA
clofibrate CTD 00005684	4.91e-12	1.61e-09	722.681	18819.1	PPARA;HIF1A;TP53;RELA;MAPK3
resveratrol BOSS	1.65e-13	1.35e-10	634.945	18689.9	STAT3;PTEN;NOX4;HIF1A;TP53;RELA;MAPK3
15442-64-5 CTD 00000915	2.14e-10	2.2e-08	832	18523.8	HIF1A;TP53;RELA;MAPK3
105156-22-7 CTD 00005867	8.74e-12	2.4e-09	639.103	16273.7	STAT3;PPARA;HIF1A;RELA;MAPK3
N-Acetyl-L-cysteine CTD 00005305	1.78e-12	8.28e-10	447.364	12104.3	STAT3;PTEN;NOX4;HIF1A;TP53;RELA;MAPK3
Indoxyl sulfate BOSS	4.77e-08	1.16e-06	705	11884.7	STAT3;TP53;MAPK3
Cetrorelix CTD 00002564	1.29e-09	8.83e-08	511.615	10472.9	STAT3;TP53;RELA;MAPK3
Sirtinol CTD 00003986	6.45e-08	1.45e-06	630.726	10443.2	TP53;RELA;MAPK3
